# Supplementary material for: Ammonia-Oxidizing Bacterial Communities in Tilapia Pond Systems and the Influencing Factors
Source: MDPI journal article supplement (doi:10.3390/app12073438), 2022-03-28
Supplement: s1 [file s1]

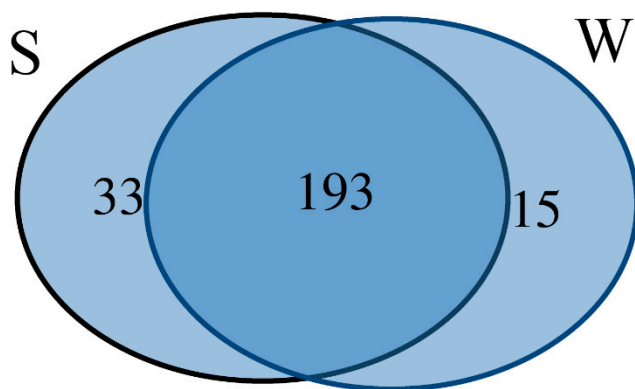

**Figure S1.** Venn diagram showing the unique and shared OTUs in libraries representing samples of water (W) and sediment (S).

Table S1. Richness and diversity of ammonia-oxidizing bacterial communities in each water samples

| Sample ID | Reads | 0.97 |              |                 |
|-----------|-------|------|--------------|-----------------|
|           |       | OTU  | Ace          | Shannon         |
| MW11      | 1791  | 85   | 106(94,134)  | 3.43(3.37,3.49) |
| MW12      | 3159  | 110  | 140(124,173) | 3.49(3.45,3.53) |
| MW13      | 1020  | 71   | 130(105,170) | 3.32(3.25,3.39) |
| MW21      | 2660  | 85   | 110(96,141)  | 3.18(3.13,3.23) |
| MW22      | 1637  | 76   | 123(103,159) | 3.24(3.18,3.3)  |
| MW23      | 2064  | 80   | 96(86,119)   | 3.23(3.18,3.29) |
| MW31      | 1571  | 77   | 119(101,153) | 3.35(3.29,3.4)  |
| MW32      | 2833  | 72   | 83(76,103)   | 3.3(3.26,3.33)  |
| MW33      | 1135  | 68   | 110(91,144)  | 3.31(3.24,3.37) |
| JW11      | 5993  | 102  | 112(106,128) | 3.28(3.25,3.31) |
| JW12      | 4218  | 88   | 116(101,151) | 3.26(3.22,3.29) |
| JW13      | 1603  | 71   | 89(78,115)   | 3.22(3.16,3.28) |
| JW21      | 3932  | 92   | 108(99,132)  | 3.25(3.21,3.29) |
| JW22      | 4390  | 92   | 107(98,130)  | 3.23(3.19,3.26) |
| JW23      | 4199  | 98   | 126(111,158) | 3.15(3.11,3.19) |
| JW31      | 1828  | 72   | 114(95,147)  | 3.08(3.02,3.13) |
| JW32      | 4287  | 88   | 106(96,131)  | 2.97(2.93,3)    |
| JW33      | 4561  | 91   | 109(99,134)  | 3.17(3.14,3.2)  |
| SW11      | 5978  | 119  | 140(129,165) | 3.26(3.23,3.29) |
| SW12      | 4639  | 102  | 118(109,139) | 3.2(3.16,3.24)  |
| SW13      | 4500  | 105  | 120(112,141) | 3.2(3.16,3.24)  |
| SW21      | 5758  | 113  | 130(120,152) | 3.37(3.34,3.41) |
| SW22      | 4236  | 122  | 153(137,186) | 3.49(3.45,3.52) |
| SW23      | 5094  | 115  | 130(121,149) | 3.45(3.41,3.48) |
| SW31      | 6650  | 112  | 134(122,159) | 3.38(3.35,3.41) |
| SW32      | 2813  | 101  | 115(107,135) | 3.57(3.53,3.61) |
| SW33      | 4788  | 98   | 117(106,143) | 3.31(3.28,3.35) |
| OW11      | 2987  | 84   | 95(88,112)   | 3.18(3.14,3.23) |
| OW12      | 6766  | 106  | 133(118,165) | 3.05(3.02,3.09) |
| OW13      | 5159  | 99   | 115(106,136) | 3.09(3.05,3.13) |
| OW21      | 4423  | 105  | 162(140,198) | 3.06(3.02,3.11) |
| OW22      | 3552  | 93   | 120(105,153) | 3.15(3.11,3.2)  |
| OW23      | 3576  | 97   | 155(132,194) | 3.01(2.96,3.06) |
| OW31      | 8006  | 96   | 119(106,153) | 3(2.97,3.04)    |
| OW32      | 6684  | 106  | 132(118,161) | 3.02(2.99,3.06) |
| OW33      | 6441  | 88   | 105(95,130)  | 2.99(2.96,3.03) |

Table S2. Richness and diversity of ammonia-oxidizing bacterial communities in each sediment samples

| Sample ID | Reads | 0.97 |              |                 |
|-----------|-------|------|--------------|-----------------|
|           |       | OTU  | Ace          | Shannon         |
| MS11      | 7180  | 140  | 169(154,199) | 3.21(3.17,3.25) |
| MS12      | 6960  | 129  | 168(149,207) | 3(2.97,3.04)    |
| MS13      | 6242  | 122  | 143(132,167) | 3.07(3.03,3.11) |
| MS21      | 3591  | 124  | 146(135,171) | 3.39(3.34,3.44) |
| MS22      | 2165  | 106  | 139(122,173) | 3.27(3.21,3.33) |
| MS23      | 4824  | 124  | 148(136,175) | 3.23(3.18,3.27) |
| MS31      | 3547  | 109  | 139(123,171) | 2.9(2.84,2.95)  |
| MS32      | 3783  | 109  | 134(121,163) | 2.98(2.93,3.03) |
| MS33      | 4628  | 128  | 150(138,174) | 3.07(3.02,3.12) |
| JS11      | 4307  | 128  | 158(143,188) | 3.14(3.09,3.19) |
| JS12      | 2676  | 124  | 148(136,174) | 3.35(3.29,3.42) |
| JS13      | 3417  | 130  | 163(147,195) | 3.32(3.26,3.37) |
| JS21      | 2341  | 136  | 163(149,190) | 3.7(3.64,3.76)  |
| JS22      | 4071  | 158  | 195(178,229) | 3.64(3.59,3.69) |
| JS23      | 1099  | 113  | 147(130,179) | 3.55(3.45,3.64) |
| JS31      | 7062  | 138  | 155(146,176) | 3.09(3.05,3.13) |
| JS32      | 5746  | 134  | 160(147,187) | 3.2(3.16,3.24)  |
| JS33      | 4705  | 125  | 146(135,169) | 3.26(3.21,3.3)  |
| SS11      | 4472  | 133  | 156(144,181) | 3.03(2.98,3.08) |
| SS12      | 2580  | 110  | 138(123,166) | 3.07(3.01,3.13) |
| SS13      | 5563  | 137  | 170(154,203) | 3.07(3.03,3.11) |
| SS21      | 6230  | 130  | 149(139,171) | 2.94(2.89,2.98) |
| SS22      | 4126  | 120  | 154(137,188) | 2.84(2.78,2.89) |
| SS23      | 5098  | 132  | 155(143,179) | 3.01(2.96,3.06) |
| SS31      | 6356  | 132  | 150(141,171) | 2.8(2.76,2.85)  |
| SS32      | 6493  | 130  | 150(139,173) | 2.87(2.83,2.91) |
| SS33      | 6532  | 147  | 171(159,196) | 2.98(2.94,3.03) |
| OS11      | 1902  | 96   | 165(139,206) | 3.03(2.96,3.1)  |
| OS12      | 3972  | 122  | 148(135,176) | 3.15(3.1,3.2)   |
| OS13      | 1965  | 111  | 138(124,166) | 3.2(3.13,3.28)  |
| OS21      | 5717  | 127  | 148(137,172) | 3(2.96,3.04)    |
| OS22      | 5266  | 132  | 164(148,196) | 2.99(2.94,3.04) |
| OS23      | 4005  | 124  | 139(131,158) | 2.96(2.91,3.02) |
| OS31      | 4673  | 132  | 149(140,169) | 2.85(2.8,2.9)   |
| OS32      | 5192  | 133  | 159(146,187) | 2.97(2.92,3.02) |
| OS33      | 5031  | 146  | 170(158,194) | 2.94(2.89,3)    |
